# Supplementary material for: The Contribution of Pharmacogenetic Drug Interactions to 90-Day Hospital Readmissions: Preliminary Results from a Real-World Healthcare System
Source: MDPI journal article supplement (doi:10.3390/jpm11121242), 2021-11-23
Supplement: s1 [file s1]

### Supplemental Material

**Table S1. List of Medication Orders/Administration from 12/01/2009 to 12/31/2020 with Orders 30 days Prior to Inpatient Admissions**

|                         | Readmission within 90 days of inpatient admission discharge date in Encounter Fact between 1/1/2010 and 3/31/2021 inclusive |                     |                   |
|-------------------------|-----------------------------------------------------------------------------------------------------------------------------|---------------------|-------------------|
| <b>CPIC medications</b> | <b>Overall</b>                                                                                                              | <b>No</b>           | <b>Yes</b>        |
| <b>N (%)</b>            | <b>2,211 (100)</b>                                                                                                          | <b>1,935 (87.5)</b> | <b>276 (12.5)</b> |
| Amitriptyline           | 26 (1.2)                                                                                                                    | 14 (0.7)            | 12 (4.3)          |
| Atazanavir              | 0 (0)                                                                                                                       | 0 (0)               | 0 (0)             |
| Atomoxetine             | 5 (0.2)                                                                                                                     | 3 (0.2)             | 2 (0.7)           |
| Azathioprine            | 9 (0.4)                                                                                                                     | 5 (0.3)             | 4 (1.4)           |
| Capecitabine            | 0 (0)                                                                                                                       | 0 (0)               | 0 (0)             |
| Celecoxib               | 287 (13)                                                                                                                    | 238 (12.3)          | 49 (17.8)         |
| Citalopram              | 24 (1.1)                                                                                                                    | 18 (0.9)            | 6 (2.2)           |
| Clomipramine            | 2 (0.1)                                                                                                                     | 2 (0.1)             | 0 (0)             |
| Clopidogrel             | 55 (2.5)                                                                                                                    | 36 (1.9)            | 19 (6.9)          |
| Codeine                 | 64 (2.9)                                                                                                                    | 45 (2.3)            | 19 (6.9)          |
| Desipramine             | 0 (0)                                                                                                                       | 0 (0)               | 0 (0)             |
| Doxepin                 | 4 (0.2)                                                                                                                     | 0 (0)               | 4 (1.4)           |
| Efavirenz               | 0 (0)                                                                                                                       | 0 (0)               | 0 (0)             |
| Escitalopram            | 120 (5.4)                                                                                                                   | 93 (4.8)            | 27 (9.8)          |
| Fluorouracil            | 4 (0.2)                                                                                                                     | 2 (0.1)             | 2 (0.7)           |
| Flurbiprofen            | 0 (0)                                                                                                                       | 0 (0)               | 0 (0)             |
| Fluvoxamine             | 1 (0)                                                                                                                       | 1 (0.1)             | 0 (0)             |
| Fosphenytoin            | 4 (0.2)                                                                                                                     | 0 (0)               | 4 (1.4)           |
| Ibuprofen               | 1064 (48.1)                                                                                                                 | 963 (49.8)          | 101 (36.6)        |
| Imipramine              | 0 (0)                                                                                                                       | 0 (0)               | 0 (0)             |
| Lansoprazole            | 31 (1.4)                                                                                                                    | 19 (1)              | 12 (4.3)          |
| Lornoxicam              | 0 (0)                                                                                                                       | 0 (0)               | 0 (0)             |
| Meloxicam               | 35 (1.6)                                                                                                                    | 29 (1.5)            | 6 (2.2)           |
| Mercaptopurine          | 1 (0)                                                                                                                       | 1 (0.1)             | 0 (0)             |
| Nortriptyline           | 20 (0.9)                                                                                                                    | 15 (0.8)            | 5 (1.8)           |
| Omeprazole              | 541 (24.5)                                                                                                                  | 416 (21.5)          | 125 (45.3)        |
| Ondansetron             | 2026 (91.6)                                                                                                                 | 1769 (91.4)         | 257 (93.1)        |
| Pantoprazole            | 298 (13.5)                                                                                                                  | 204 (10.5)          | 94 (34.1)         |
| Paroxetine              | 24 (1.1)                                                                                                                    | 16 (0.8)            | 8 (2.9)           |
| Peginterferon-Alfa-2a   | 0 (0)                                                                                                                       | 0 (0)               | 0 (0)             |
| Peginterferon-Alfa-2b   | 0 (0)                                                                                                                       | 0 (0)               | 0 (0)             |
| Phenytoin               | 6 (0.3)                                                                                                                     | 3 (0.2)             | 3 (1.1)           |
| Piroxicam               | 0 (0)                                                                                                                       | 0 (0)               | 0 (0)             |
| Sertraline              | 102 (4.6)                                                                                                                   | 84 (4.3)            | 18 (6.5)          |
| Simvastatin             | 91 (4.1)                                                                                                                    | 66 (3.4)            | 25 (9.1)          |
| Tacrolimus              | 10 (0.5)                                                                                                                    | 5 (0.3)             | 5 (1.8)           |
| Tamoxifen               | 6 (0.3)                                                                                                                     | 6 (0.3)             | 0 (0)             |
| Tenoxicam               | 0 (0)                                                                                                                       | 0 (0)               | 0 (0)             |

|              |            |           |           |
|--------------|------------|-----------|-----------|
| Thioguanine  | 0 (0)      | 0 (0)     | 0 (0)     |
| Tramadol     | 347 (15.7) | 252 (13)  | 95 (34.4) |
| Trimipramine | 0 (0)      | 0 (0)     | 0 (0)     |
| Tropisetron  | 0 (0)      | 0 (0)     | 0 (0)     |
| Voriconazole | 0 (0)      | 0 (0)     | 0 (0)     |
| Warfarin     | 237 (10.7) | 185 (9.6) | 52 (18.8) |

**Table S2. Frequency of 90-day Readmission Diagnostic Categories (N=281)**

| <b>Diagnostic Categories</b>     | <b>Frequency</b> | <b>Percent</b> |
|----------------------------------|------------------|----------------|
| Behavioral/Psychiatric           | 27               | 9.82           |
| Cancer/Neoplasm                  | 32               | 11.64          |
| Cardiovascular                   | 16               | 5.82           |
| Developmental/Disability         | 1                | 0.36           |
| Endocrine/Metabolic              | 48               | 17.45          |
| Gastrointestinal                 | 30               | 10.91          |
| Genitourinary                    | 3                | 1.09           |
| Gynecological                    | 1                | 0.36           |
| Hematological                    | 16               | 5.82           |
| Infection/Abscess                | 2                | 0.73           |
| Infection/Abscess/Other          | 9                | 3.27           |
| Infection/Dermatological/Abscess | 3                | 1.09           |
| Infection/Gastrointestinal       | 9                | 3.27           |
| Infection/Genitourinary          | 3                | 1.09           |
| Infection/Respiratory            | 5                | 1.82           |
| Inflammatory/Rheumatological     | 2                | 0.73           |
| Neurological                     | 10               | 3.64           |
| Obstetrical                      | 21               | 7.64           |
| Orthopedic/Musculoskeletal       | 13               | 4.73           |
| Pain                             | 4                | 1.45           |
| Pulmonary                        | 10               | 3.64           |
| Vascular                         | 1                | 0.36           |
| Vascular/Non-Cardiac             | 9                | 3.27           |

\*6 patients missing readmission diagnosis.
